# Supplementary material for: Climate signals in a multispecies tree-ring network from central and southern Italy and reconstruction of the late summer temperatures since the early 1700s
Source: Copernicus journal article supplement (doi:10.5194/cp-13-1451-2017), 2017-11-02
Supplement: Supplementary file 1 [file cp-13-1451-2017-supplement.zip]

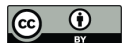

## *Supplement of*

# **Climate signals in a multispecies tree-ring network from central and southern Italy and reconstruction of the late summer temperatures since the early 1700s**

**Giovanni Leonelli et al.**

*Correspondence to:* Giovanni Leonelli ([giovanni.leonelli@unimib.it](mailto:giovanni.leonelli@unimib.it))

- [cp-13-1451-2017-supplement-title-page.pdf](#)
- [OnLineMaterial1.pdf](#)
- [OnLineMaterial2.xlsx](#)

The copyright of individual parts of the supplement might differ from the CC BY 3.0 License.
