# Supplementary material for: Climate signals in a multispecies tree-ring network from central and southern Italy and reconstruction of the late summer temperatures since the early 1700s
Source: Copernicus journal article supplement (doi:10.5194/cp-13-1451-2017), 2017-11-02
Supplement: Supplementary file 1 [file OnLineMaterial2.xlsx]

## Sheet: References
Online Material 2
Please find the complete reference to this data in the original article in Climate of the Past
Climate signals in a multispecies tree-ring network from central and southern Italy and reconstruction of the late summer temperatures since the early 1700s
Giovanni Leonelli1, Anna Coppola2, Maria Cristina Salvatore2, Carlo Baroni2,3, Giovanna Battipaglia4,5, Tiziana Gentilesca6, Francesco Ripullone6, Marco Borghetti6, Emanuele Conte7, Roberto Tognetti7, Marco Marchetti7, Fabio Lombardi8, Michele Brunetti9, Maurizio Maugeri9,10, Manuela Pelfini11, Paolo Cherubini12, Antonello Provenzale3, Valter Maggi1,3
1 Università degli Studi di Milano–Bicocca — Dept. of Earth and Environmental Science
2 Università degli Studi di Pisa — Dept. of Earth Science
3 Istituto di Geoscienze e Georisorse, Consiglio Nazionale delle Ricerche, Pisa
4 Università della Campania — Dept. DiSTABiF
5 University of Montpellier 2 (France) — PALECO EPHE
6 Università degli Studi della Basilicata — School of Agricultural, Forestry, Food and Environmental Sciences, Potenza
7 Università degli Studi del Molise — Dept. of Bioscience and Territory
8 Università Mediterranea di Reggio Calabria — Dept. of Agronomy
9 Istituto di Scienze dell’Atmosfera e del Clima, Consiglio Nazionale delle Ricerche, Bologna
10 Università degli Studi di Milano — Dept. of Physics
11 Università degli Studi di Milano — Dept. of Earth Science
12 Swiss Federal Institute for Forest, Snow and Landscape Research WSL (Switzerland)
Correspondence to: Giovanni Leonelli (giovanni.leonelli@unimib.it; giovanni.leonelli@gmail.com)

## Sheet: selected RCS-INDEXED MXD series
Year / Code	614011	614012	614042	614052	614061	614062	614071	614101	614102	614122	616012	616021	616022	616041	616042	616051	616052	616061	616062	616071	616081	616082	616101	616102	616111	616112	616121	616122	617031	617112	618122	620011	620022	620031	620032	620041	620042	620051	620052	620061	620071	620072	620081	620082	620091	620092	620101	620111	620121
1556
1557
1558
1559
1560
1561
1562
1563
1564
1565
1566
1567
1568
1569
1570
1571
1572
1573
1574
1575
1576
1577
1578
1579
1580
1581
1582
1583
1584
1585
1586
1587
1588
1589
1590
1591
1592
1593
1594
1595
1596
1597
1598
1599
1600
1601
1602
1603
1604
1605
1606
1607
1608
1609
1610
1611
1612
1613
1614
1615
1616
1617
1618
1619
1620
1621
1622
1623
1624
1625
1626
1627
1628
1629
1630
1631
1632
1633
1634
1635
1636
1637
1638
1639
1640
1641
1642
1643
1644
1645
1646
1647
1648
1649
1650
1651
1652
1653
1654																																906
1655																																933
1656																																889
1657																																926
1658																																964
1659																																991
1660																																995
1661																																962
1662																																998
1663																																960
1664																																1050
1665																																1001
1666																																1002
1667																																865
1668																																1009
1669																																928
1670																																938
1671																																1041
1672																																968
1673																																1049
1674																																1015
1675																																866
1676																																847
1677																																911
1678																																879
1679																																915
1680																																899
1681																																940
1682																																924
1683																																1005
1684																																855
1685																																927
1686																																1035
1687																																953
1688																																892
1689																																914
1690																																995																1010
1691																																1018																1048
1692																																993																1040
1693																																1027																1135
1694																																990																1114
1695																																1011																862
1696																																1056																948
1697																																1079																1056
1698																																951																939
1699																																941																936
1700																																1034																1003
1701																																964																1094
1702																																1080																1049
1703																																1034																1041
1704																																1081																1114
1705																																966																1057
1706																																1108																1067
1707																																1019																1006
1708																																1128																1062
1709																																1012																1002
1710																																1036																1026
1711																																989											952					1006
1712																																921											1037					976
1713																																959			987								982					994
1714																																817			910								903					1010
1715																																1053			1063								1103					1033
1716																																874			949								967					982
1717																																990			975								1042					1058
1718																																1072			932								1080					1123
1719																																978			936								1021					1087
1720																																1085			951								1077					1101
1721																																1049			951								1038					1045
1722																																1131			972								1082					1070
1723																																940			898								1025					1047
1724																																996			931								1111					1080
1725																																911			862								1067					1031
1726																																965			865								1081					1030
1727																																1019			915								1044					1111
1728																																1017			893								1029					1064
1729																																972			891								1027			1078		1050
1730																																974			912								1025			1014		1060
1731																																941			805								1015			1005		1022
1732																																1082			967								1041			1030		1079
1733																																965			875								1094			1056		1032
1734																																1023		1021	854								1100			1119		1068
1735																																1023		922	894								1093			1018		1103
1736																																965		982	923								1022			998		1080	918
1737																																1023		926	855								1100			986		1127	968
1738																																1047		917	641								1070			890		1139	1051
1739																																1001		909	757								1088			793		1069	996
1740																																803		936	647								1028			884		1093	1022
1741																																1023		927	690				1067				913		1056	967		1036	1014
1742																																904		892	643				956				1033		875	865		1027	890
1743																																959		925	831				947				964		809	892		1065	892
1744																																1001		910	646				984				1059		972	905		1081	998
1745																																1017		873	765				836				1057		998	974		1083	925
1746																																1090		944	835				944				1102	998	1072	994		1142	1120
1747																																1040		924	716				819				1112	956	972	957		1107	1059
1748																																993		962	797				986				1088	993	998	920		1133	990
1749																																947		916	925				939				970	915	927	886		1124	924
1750																																1050		1044	971				972				1062	1010	1030	1053		1113	1032
1751																																1064		865	912				1038				1095	1061	1120	1047		1088	987
1752																																1000		957	770				1001				1092	1030	1082	1041		1063	1044
1753																																960		967	932				1002				1044	1009	886	938		1037	1099
1754																																1011		933	825				947				1044	1021	935	701		1119	980
1755																																1017		1006	766				1009				1102	1053	1056	686		1131	1095
1756																																1022		988	847				998				1057	1026	1034	929		1085	1050
1757																																1085		970	870				962				1068	1082	915	889		1096	1076
1758																																995		986	894				947				1034	1025	994	888		1095	1071
1759																																938		962	848				933				1000	1052	887	902		1117	1017
1760																																996		970	883				979				1023	1091	944	974		1161	1093
1761																																914		893	848				898				1000	987	863	870		1039	1045
1762																																1007		1053	965		1124		983				1106	1079	1006	964		1093	1088
1763																																1029		1052	954		1083		1012				1097	1111	1059	1033		1100	1070
1764																																981		983	966		1109		923				1077	1120	887	891		1075	1053
1765																																946		904	922	1044	1030		938				1058	1084	915	960		1099	1028
1766																																889		988	1042	1037	1184		1010				1130	1120	879	959		1090	1124
1767																																948		917	928	1028	1177		875				1012	1053	875	865		1081	986
1768																																1029		1033	977	891	1159		1046				1143	1141	1046	1097		1175	1082
1769																																1014		984	918	929	1150		982				1110	1124	994	932		1117	1070
1770																																998		936	883	874	1127		876				1089	1045	935	964		1081	1069
1771																																993		936	862	936	1159		948				1078	1128	948	951		1116	1148
1772																																977		970	817	951	1143		974				1136	1112	1010	997		1116	1100
1773																																929		910	758	962	1129		964				1039	1035	917	905		1081	1076
1774																																1000		955	934	1018	1154		929				1120	1123	894	1010		1128	1122
1775																																981		941	838	991	1064		963				1119	1087	916	952		1106	1155
1776																																976		905	872	1036	1114		961				1060	1065	820	964	964	1106	1118
1777																																1088		928	801	1084	1175		1018				1108	1080	913	1000	1025	1116	1115
1778																																1023		975	801	1006	1173		912				1026	1023	924	895	1074	1090	940
1779																																1014		917	825	938	1134		830				1083	1047	900	907	1100	1075	916
1780																																968		941	825	940	1120		933				1046	1080	805	920	1103	1093	928
1781																																1014		941	801	938	1118		978				1078	1055	873	1015	1107	1086	987
1782																																1106		964	893	971	1120		918				1109	1100	1022	1019	1135	1079	1034
1783																																962		918	914	980	1076		870				1046	1006	986	893	1080	1006	1010
1784																																981		1035	1051	1025	1176		1009				1088	1087	928	965	1162	1128	1069
1785																																1035		1048	1035	1038	1159		1033				1121	1108	1033	977	1077	1117	1046
1786																																928		945	996	924	1152		941				926	990	766	883	1061	982	1012
1787																																985		972	1052	953	1152		987				1020	1069	975	909	1152	1030	989
1788																																1032		1000	1088	935	1124		1000				1081	1067	1068	876	1107	955	1073
1789																																974		977	1055	1021	1140		964				1012	986	941	912	1052	971	1112
1790																																964		1012	1046	1057	1053		895				1035	1056	953	923	1056	1080	952
1791																																941		978	1035	1017	1133		791				907	941	837	815	998	959	1000
1792																																1011		956	989	1070	1065		850				1034	1010	954	860	1020	1092	1000
1793																																989		970	1035	1088	1080		945				1069	1068	980	930	1064	1027	1095
1794																																956		936	1011	1040	1094		878				930	976	937	872	968	1019	1003
1795																																982		934	1011	1054	1106		870				1000	1000	893	931	1025	1020	994
1796																																995		933	1023	1033	1092		906				1013	1023	930	896	1015	1020	924
1797																																1056		1037	1082	1070	1113		1000			1044	1082	1129	1036	942	1158	1043	1076
1798																																916		954	955	1000	1088		966			841	988	980	824	835	1023	925	897
1799																																1011		919	1036	998	1099		885			913	997	984	885	785	994	994	966
1800																																953		967	1000	1031	1064		959			1030	982	987	982	864	986	1028	978
1801																																1000		920	997	1018	1073		900			905	943	977	876	756	1069	958	837
1802																																988		1001	1017	1018	1106	1033	1017			991	1109	1106	1076	973	1112	1088	1073
1803																																869		893	955	982	1092	829	968			819	942	1001	685	763	1000	1006	872
1804																																950		926	1040	1015	1079	866	1120			998	1051	1027	931	937	1041	1041	1036
1805																																890		911	1022	1071	1067	845	942			974	981	959	860	777	1040	1002	987
1806																																925		883	1029	1022	1068	940	931			890	970	983	931	802	1019	963	1055
1807																																972		949	981	963	1115	967	967			1026	1039	1065	978	907	1080	1004	1063
1808																																761		867	992	997	1068	831	896			756	985	992	802	814	1012	1000	930
1809																																961		960	1073	1091	1138	974	930			1084	1091	1096	954	918	1141	1055	1112
1810																																809		904	1041	1045	1104	986	917			900	1040	1036	811	895	1045	1011	1075
1811																																798		941	1023	1034	1081	936	985		998	892	1057	1072	903	883	1020	947	1007
1812																																681		919	994	1068	965	805	911		898	799	994	978	771	779	971	988	846
1813																																693		919	1034	1069	1013	931	965		1132	751	1000	1049	849	803	877	936	976
1814																																716		884	924	988	1015	804	834		972	655	910	919	648	710	900	975	791
1815																																715		965	1000	1093	1089	1006	1006		1033	758	1077	1093	960	873	1027	1026	977
1816																																750		872	968	931	964	856	903		862	722	879	961	787	721	885	980	872
1817																																703		1023	1007	1062	1083	940	1090		995	828	1055	1051	904	904	1104	1108	895
1818																																702		919	1032	1054	1106	950	825		845	714	1031	1011	918	867	1044	1071	1000
1819																																691		861	961	1034	1060	982	1059		845	812	937	938	814	817	986	985	907
1820																															654	750		1001	1054	1083	1086	957	1070		1065	994	1146	1121	1082	880	1114	1156	1058
1821																															693	786		907	1054	1083	1030	1025	965		875	831	1040	1076	884	806	1022	1082	1071
1822																															698	833		1009	1029	1025	959	991	1058		1001	1045	1098	1055	976	859	1138	1102	1106
1823																															792	657		1040	1063	1027	1029	936	953		1025	1006	1076	1023	965	778	1080	1101	1081
1824																															898	669		966	1016	1065	1015	894	953		865	882	1030	1035	884	846	1022	1067	962
1825																															765	671		926	994	1007	1037	958	965		915	807	970	989	861	790	1034	1032	959
1826																															832	723		908	1065	1065	1013	974	943		905	806	1014	1023	861	849	1023	1068	920
1827							984																								812	762		859	1005	1074	1025	760	838		845	808	951	965	768	784	1013	987	880
1828							1012																								803	895		1004	1060	1108	1085	1053	1058		1017	1057	1119	1093	1023	1017	1120	1104	1135
1829							1075																								838	777		902	974	1072	967	964	974		840	941	919	884	951	793	1030	1071	1006
1830							1066																						1055	808	826	837		1028	1119	1155	1048	1006	1017		1037	1047	1101	1117	1005	1005	1093	1213	1083
1831							964																						1068	877	967	884		860	988	1049	1046	923	909		898	951	976	978	805	836	953	1075	936
1832							1017																						1115	935	799	895		909	1032	1132	1043	913	880		959	1055	1005	1013	857	922	1142	1124	949
1833							1083																						1062	994	611	772		914	1000	1072	946	974	931		941	995	953	872	942	749	989	1056	962
1834							1039																						973	1018	675	910		976	1039	1105	965	1000	995		970	1006	1029	1032	938	856	1074	1080	1046
1835							1042																						905	927	796	916		797	918	1043	973	800	767		831	701	823	774	699	680	923	1058	914
1836							1091																						982	1004	864	969		941	1041	1051	960	928	947		915	1062	1037	920	925	679	1066	1117	1022
1837							1131																						1003	958	878	977		863	952	1023	891	973	915		875	955	956	869	915	621	1076	1070	971
1838							941																						1026	959	946	1031		960	1037	1077	1020	983	1007		1000	1057	1097	942	985	737	1039	1105	1080
1839							1033																						993	960	880	982		950	1003	1064	860	936	966		982	1021	1024	938	955	631	1049	1128	1039
1840							1027																						1119	1017	913	1036		996	967	1088	826	935	994		970	1032	1079	925	971	678	1001	1103	984
1841							1020																						1097	961	944	1080		925	1012	1078	907	945	988		1019	1091	1051	970	919	854	1049	1125	1102
1842							969																						995	928	852	998		738	903	1034	884	815	878		845	917	931	847	751	737	884	1054	1008
1843							975																						1050	1016	867	1021		912	981	1082	1023	930	1045		964	1022	998	928	941	795	1049	1101	1078
1844							1187																						1115	935	894	1080		958	1001	1070	953	1009	1050		1023	1000	1078	1011	1062	886	1107	1148	1101
1845							1057																						1136	922	955	1026		865	917	1116	1023	928	995		951	1022	997	960	972	742	1000	1067	1053
1846							1027					1094																	1168	1000	933	1066		936	939	1116	1082	928	926		1090	1139	1032	1000	915	912	1114	1196	1145
1847							1000					995																	931	864	904	955		913	916	1104	931	906	1020		913	1035	975	924	903	712	1004	1092	1005
1848							1022					1052																	1032	987	971	1040		912	986	1116	1059	906	1019		1006	1106	1057	1034	914	997	1104	1045	1029
1849							1007					1029																	1065	942	909	1020		991	987	1128	1034	1000	1054		1029	1120	1023	980	984	885	1123	1092	1053
1850							1016					1039																	997	896	908	870		847	906	1083	1009	802	877		875	1007	908	831	713	843	936	1033	1005
1851							942					971																	1020	1009	981	954	906	877	930	1059	1052	814	958		908	1011	1003	926	829	895	903	1056	1072
1852							845					924																	1055	965	966	1014	979	954	966	1116	1070	907	1016		1022	918	1005	914	935	901	974	1113	1067
1853							1010					921																	1067	876	985	1026	1005	883	968	1090	1040	861	994		1056	1012	1007	984	982	964	1069	1136	1085
1854							807					974																	965	932	952	1048	972	907	982	1121	1011	922	995		1032	1025	997	937	878	967	1012	1100	1080
1855							864					994			1038		1027												1031	1043	996	1011	1056	970	948	1093	1040	808	1041		975	1098	986	971	912	968	1012	1101	1078
1856							816					883			1006	915	928												987	998	913	1008	1072	976	985	1097	1026	917	1049		941	852	1011	970	886	979	977	1102	1011
1857							912					905			1063	917	1029			837									864	819	948	865	1053	865	916	1079	992	871	951		917	924	929	841	835	871	872	1079	1051
1858							846					959			1018	929	984			861	949								898	865	896	838	1045	917	940	1096	971	906	993		906	875	953	900	854	856	837	1056	1046
1859							997					1057	1072	893	1118	1085	1017			918	962								942	841	930	1022	1009	896	929	1105	985	930	1000		929	921	1011	936	758	934	942	1090	1064
1860							980					968	995	1018	1060	1106	938		726	906	929						1072		984	850	963	963	1089	991	1094	1094	1102	968	1135		1011	1072	1045	947	997	989	1058	1068	1000
1861							1047					1088	1074	918	1069	1127	1058		906	984	996	1060					1107		1046	979	1017	1032	1073	979	1093	1141	1062	1030	1091		1058	1036	1056	862	953	1021	1118	1142	1155
1862	1102						1099					1019	1029	928	966	1091	1032		1041	848	972	995					1052		1000	1032	1028	962	1047	953	1069	1143	1034	971	1062		1048	1001	972	789	912	928	1036	1019	932
1863	1106						1004					1017	1039	916	1062	1121	1051		996	768	1005	1018					1040		809	987	943	1043	1060	1009	1067	1125	1086	1005	1058		1062	1037	925	750	976	1020	1069	1000	1002
1864	921						1017					1005	1027	915	1049	1051	1071		1028	821	969	996					1039		953	975	922	1010	982	829	984	1097	987	862	889		937	896	913	804	830	905	951	1015	1000
1865	1030						1016				1183	1048	1013	1013	1104	1093	1082		860	974	988	1017		1060			1060		1031	998	996	1022	1103	1047	972	1126	1109	1002	1070		905	942	937	757	1034	1033	1029	1028	1009
1866	1023						915				1096	1015	1032	966	971	1082	1048		991	928	952	960		1040	938		1036		1032	1043	1026	1033	928	882	1019	1144	1089	954	978		1000	929	961	873	908	964	978	1064	1121
1867	1077						776				1119	1059	1062	1007	1080	1103	1091		1010	1026	1038	980		996	939		1077		923	978	1024	1055	1020	916	1078	1162	1079	1013	1050		942	973	1079	958	921	1023	971	968	1152
1868	1059			914			879				1029	1016	1060	939	958	1047	1046		1040	938	927	921		951	839	871	1073		901	924	980	1029	1017	904	1043	1085	1090	943	967		989	969	998	883	802	955	965	1014	1091
1869	1112			906	832	938	1086				1062	930	927	927	957	1057	1035		994	926	927	919	915	995	861	839	1016		967	989	936	1039	1050	882	1009	1148	1101	908	1012		1133	1058	1010	854	777	921	995	1081	1020
1870	1090			933	883	930	1103				938	911	894	894	923	1046	1011		1071	870	871	850	895	1005	861	895	993		1020	976	1020	968	920	813	1021	1126	1066	801	915		1089	1042	1010	823	809	888	959	922	1090
1871	1116			971	957	1027	1028				1058	1078	981	1047	1030	1099	1074	1060	1059	957	947	949	1018	1024	915	1018	1048		841	929	1007	945	921	894	1022	1090	1029	893	969		1019	1029	1033	872	806	925	970	1057	1102
1872	1033			952	900	1007	982				1121	1113	1079	1090	1061	1107	1094	1096	1058	956	957	938	984	1066	958	972	1036		926	1014	929	1038	1018	953	1034	1183	1133	926	1024		1100	1041	1056	873	931	1009	1005	1121	1149
1873	1075	1078		957	952	1035	963				996	948	924	1024	917	1039	1026	951	1057	844	802	849	838	952	866	848	925		967	912	959	1040	965	896	986	1124	1110	946	917		1110	1067	1019	802	952	1022	1019	1081	1092
1874	1131	1095		974	957	1041	1016				1060	1069	1000	1077	1091	1048	1026	1018	980	973	987	958	1005	1049	852	946	1057	1105	964	953	935	1010	876	933	997	1064	1064	930	962	1021	1072	1011	995	988	962	952	943	1043	1116
1875	1089	945	1055	1039	1035	1059	1034		949		1082	1102	1085	1107	1069	1037	1080	1006	1033	939	1017	980	980	1049	983	944	1066	1073	974	1040	1017	1050	962	970	1019	1121	1147	961	1043	1002	1013	1070	995	973	1009	953	1062	1051	1176
1876	982	1030	883	945	894	906	892		942		927	1058	973	973	993	1004	960	938	954	884	939	923	932	993	894	952	1008	1074	986	997	921	975	927	878	984	1122	1087	948	974	1040	1107	965	960	1028	974	929	988	1036	1143
1877	1081	1071	1016	1055	981	1005	988	938	874		1124	1190	1136	1147	1157	1124	1103	1036	1028	982	1037	987	1029	1136	982	994	1094	1141	1010	944	931	1063	958	938	1042	1134	1130	960	987	1111	1108	1070	1008	1001	1080	1046	1121	1080	1134
1878	1136	1029	1054	1082	1006	1067	1033	977	1007		1013	1145	1037	1113	1138	1059	1072	1000	983	917	927	919	1016	1090	871	938	1059	1106	1088	1022	1005	1056	1011	1022	1019	1135	1125	1032	1069	1114	1132	1081	1068	1056	1045	940	1162	1021	1183
1879	1077	926	1047	1124	960	997	1067	968	987	1149	1123	1188	1091	1124	1130	1116	1086	1096	1015	983	1048	1005	1060	1112	969	1037	1026	1105	1021	1043	986	1120	1018	1081	1125	1134	1096	1034	1069	1119	1095	1116	1009	974	1081	985	1097	975	1173
1880	1057	943	945	935	855	1038	900	959	957	1071	1099	968	917	971	1045	955	990	950	938	864	863	862	971	934	803	937	949	1024	1053	966	947	969	911	964	950	1060	1068	919	955	1053	1046	1046	950	928	931	937	1042	976	1104
1881	966	908	1000	928	848	935	974	904	890	1110	1030	1133	983	1048	1091	1001	1025	927	939	922	963	917	1025	954	901	991	982	1055	965	954	962	1055	995	953	1021	1125	1043	861	945	1021	1055	1047	1056	998	1003	1054	1126	1061	1152
1882	976	909	918	858	903	1027	905	873	894	995	1115	1121	1061	1061	1080	1014	1036	927	961	946	977	1004	1057	1017	998	1046	1016	1007	1030	997	967	1031	927	988	1008	1085	1091	977	970	1045	1016	1036	1036	998	958	1007	1067	1020	1188
1883	1010	936	920	919	908	1007	970	938	920	1023	1147	1142	1086	1086	1102	992	1014	959	952	937	1023	1026	1101	1081	973	1022	1006	1038	843	777	916	935	788	881	974	1023	993	802	866	972	1035	920	959	906	937	914	1019	966	1082
1884	923	855	873	876	845	932	889	931	873	957	1015	945	924	913	948	893	970	815	801	849	826	864	835	840	775	844	922	982	940	809	862	874	823	903	1013	1009	976	930	938	886	984	976	1012	907	950	879	925	1005	1023
1885	992	947	985	942	926	1000	978	993	960	1035	1178	1058	981	981	1025	1014	1014	968	957	970	981	988	1041	1026	873	995	1034	1048	1015	906	990	1017	904	1008	1078	1080	1099	942	963	1059	936	1009	1110	1036	951	997	1017	1044	1128
1886	990	965	965	1008	967	991	1006	994	941	1088	1091	1085	1036	1025	1080	1003	981	956	926	904	970	913	973	982	862	950	981	1047	991	937	967	1039	902	960	1060	1074	1105	931	917	1025	1018	1040	1087	1038	940	986	981	1035	1150
1887	964	945	984	979	886	996	1012	1082	959	1163	1136	1145	1091	1069	1090	1069	1090	976	1047	926	1003	1003	1081	1070	895	960	1080	1101	1045	969	1020	1026	901	960	1027	1127	1073	896	894	1052	1020	1047	1052	1005	988	998	1086	1061	1113
1888	1070	1056	1027	1048	858	1015	1105	1136	941	1140	1127	1159	1058	1058	1078	1079	1067	962	1047	948	1003	1003	1070	1050	895	993	1036	1112	969	925	953	1061	947	1007	1039	1099	1109	954	953	1091	976	1063	1111	1030	964	1057	1076	1108	1007
1889	937	926	895	901	891	915	938	910	796	1082	998	1105	959	959	957	990	1056	928	1047	903	948	959	971	966	908	993	1003	1099	1012	990	1014	1083	970	973	1028	1011	1085	930	870	1010	989	1022	1062	997	917	939	1018	1132	1101
1890	983	918	932	1031	889	938	1018	1064	932	1136	1045	1116	926	915	935	957	1034	906	959	902	969	1003	971	990	944	1070	992	1041	882	827	967	1011	980	950	920	1002	1094	974	951	1020	965	1085	1034	1010	904	1067	1017	1072	1054
1891	1017	1044	1062	1040	839	1019	1057	1069	1012	1168	1091	1071	947	980	1055	1001	1033	873	981	858	968	992	994	1014	913	996	1025	1039	1013	1002	1018	1033	1083	1068	918	1086	1114	1005	1009	1099	1035	1060	1111	1058	1021	1043	1095	1128	1067
1892	1055	991	1028	1073	885	980	1065	1056	1028	1176	1069	1048	924	979	1021	978	1010	873	1002	880	968	937	996	1003	892	933	958	1016	927	883	935	973	1000	986	844	1049	1051	886	961	1050	1023	1071	1034	1035	949	972	998	1078	974
1893	1013	915	899	1048	871	1026	1007	1099	996	1131	1080	1070	1001	1034	1110	1000	1044	852	990	857	935	969	1053	948	926	990	1034	1059	950	896	961	996	951	987	839	1047	1012	891	984	1060	907	1050	1051	1070	960	983	1039	1040	1104
1894	1009	1034	1063	1058	988	1060	1047	1065	1003	1168	1080	1082	990	968	1047	956	1025	930	1001	911	989	1012	1045	1003	970	1003	1012	1047	961	1038	990	1021	986	1057	916	1091	1079	942	948	1096	965	1087	1047	1035	890	1077	1057	1071	1174
1895	1113	1091	1108	1056	951	1058	1088	1178	1084	1173	1146	1152	1066	1132	1107	1047	1107	988	1056	1033	1054	1023	1124	1102	1003	1025	1056	1080	1017	1027	978	990	951	997	853	1004	1043	904	937	1053	954	1046	997	1034	984	1067	1032	1000	1139
1896	925	873	889	900	819	914	937	906	865	967	1014	920	922	944	1001	830	945	803	857	815	857	924	816	903	783	849	912	983	919	941	954	922	871	902	814	977	985	812	809	988	780	982	912	938	844	915	896	1021	975
1897	1014	954	1043	1076	935	1054	1081	1072	995	1069	1090	1091	1022	1066	1059	989	1092	959	1010	908	1003	1000	1036	1035	937	1003	1054	1072	985	942	1036	1021	987	995	892	1068	1067	992	997	1136	943	1034	1025	1066	985	1068	1074	1032	1032
1898	1065	941	932	1055	969	993	1019	1022	932	1063	1023	1116	1014	1036	1038	936	1060	915	989	901	974	988	1025	1012	925	1003	1011	1086	974	941	1062	988	976	948	855	1043	1010	937	1021	1116	930	1051	953	1007	927	997	1000	985	867
1899	1041	844	1026	1037	1031	1066	1067	983	990	1060	1045	1049	974	1085	1049	971	1038	937	981	936	1023	989	1058	1045	1001	1014	1014	1001	929	852	1009	978	1022	925	875	1020	1045	951	963	1093	916	1034	1044	1030	857	1009	1006	1009	972
1900	979	925	952	937	918	918	968	1004	964	1070	1045	1015	923	1045	1071	949	1038	893	963	982	981	970	1036	979	924	969	996	1036	971	862	1032	1028	953	996	873	1009	1011	989	975	1029	948	1015	986	996	916	1048	964	975	995
1901	903	829	915	944	913	985	965	906	868	995	1033	1037	925	1048	1003	926	1014	838	901	893	971	908	1013	956	858	946	978	970	948	893	1030	991	977	950	860	1022	1001	777	904	1035	909	1030	976	961	928	936	978	906	995
1902	1031	981	1032	1022	1016	1040	1045	1036	985	1159	1087	1059	926	1060	1036	970	1059	937	1014	993	1049	1034	1045	1000	1000	1012	1026	1058	1132	1045	1149	1086	989	1009	998	1115	1084	988	962	1111	1017	1137	1049	1067	915	1060	1157	964	1125
1903	1035	983	1006	1038	1034	1071	1052	1082	1018	1109	1099	1103	982	1116	1037	981	1026	947	1027	959	1026	1048	1056	1044	1000	990	993	1025	1033	935	1089	1059	1003	1008	988	1093	1075	1005	996	1157	988	1125	1020	1033	891	1051	1132	1008	1044
1904	1015	1037	1076	1065	1075	1099	1082	1068	1005	1095	1080	1079	960	1082	1007	1015	1096	913	982	880	992	1016	1023	1036	945	1022	1038	1025	1021	934	1064	1081	995	997	1003	1106	1101	883	948	1136	983	1078	1071	1057	808	1028	1000	995	1103
1905	1008	973	995	992	1016	1040	996	1006	960	1177	1140	1044	959	1092	1066	1040	1111	1001	1026	948	1014	1005	1055	1051	958	966	1071	1058	975	942	964	1090	1000	1001	996	1073	1126	992	948	1104	1004	1112	1052	1034	925	992	1079	958	1067
1906	1052	932	1013	1003	1005	1090	983	993	965	1115	1112	1064	1003	1114	1069	1077	1091	1023	970	984	1026	1071	1076	1078	1018	1044	1003	1057	1080	918	997	955	918	1019	896	1040	1045	878	761	1082	868	982	974	951	831	968	981	945	1068
1907	1088	998	1009	1086	1101	1163	1102	1114	997	1160	1081	1096	1071	1060	1025	1035	1104	956	1070	965	1040	1026	1110	1148	1001	1014	1059	1023	1045	894	1009	1000	1000	1024	1005	1101	1128	973	867	1094	949	1098	1082	1102	879	1002	954	991	989
1908	1046	965	1004	1068	1001	1074	1008	1073	980	1088	1105	995	940	995	1015	1059	1117	889	1015	889	1043	1003	1003	1027	936	930	1026	1001	1034	937	1035	876	978	955	985	1079	1035	1055	774	1104	962	1028	966	1078	950	1070	1010	934	900
1909	1028	893	864	963	1007	1043	903	1021	901	995	982	998	898	987	1015	891	970	835	839	879	1001	948	952	927	871	912	940	935	1047	907	1030	989	921	1028	917	1045	1058	949	798	1125	898	1029	979	1019	892	934	939	948	1048
1910	950	858	941	919	1035	975	929	968	916	1013	1015	957	877	979	1037	959	1037	760	931	744	1003	940	912	960	949	948	987	967	1030	889	1003	1001	947	1004	943	1058	1046	937	868	1135	891	936	943	995	762	1010	904	963	1051
1911	1049	1052	1065	996	1074	1063	1029	1010	1016	1093	1092	1030	992	1104	1138	1049	1082	919	967	970	993	1043	1070	1059	993	1038	1012	1021	1057	926	1065	995	995	1004	920	1070	1081	971	892	1170	953	1017	1024	1066	927	1039	1090	1039	1111
1912	1012	903	882	898	972	937	915	1002	772	871	1014	932	914	880	979	958	1002	756	845	800	959	911	926	880	836	893	935	945	940	940	1070	981	911	930	908	1023	1091	864	824	1145	820	897	952	973	824	860	906	987	1052
1913	1069	1056	1028	993	1004	1075	1019	1040	967	1059	1060	1026	993	1038	1091	1024	1091	903	1004	946	1037	1025	1027	1026	936	960	1015	1003	952	886	1030	909	968	1058	1013	1035	1019	970	1019	1132	953	1021	1031	1103	1019	1078	1022	921	1075
1914	983	915	866	892	1017	1064	878	968	854	928	995	1007	970	992	1078	1001	1044	837	846	856	1014	1015	948	928	903	981	993	996	962	896	1012	983	872	910	823	975	1077	854	762	1095	817	842	970	974	786	820	895	997	1097
1915	996	1003	922	980	963	1022	980	1028	958	991	1032	1021	913	1048	1076	988	1042	815	970	866	1013	1004	1014	954	962	970	1026	978	1015	895	994	1051	989	1069	914	1021	1089	901	788	1150	890	873	990	1020	860	886	943	989	1105
1916	986	925	903	962	1028	1016	983	1049	855	1041	1012	964	934	979	1096	986	1029	826	901	876	1012	981	958	922	1000	1026	980	1003	1058	861	974	993	966	899	900	1031	1054	912	872	1114	903	929	1045	1068	884	884	933	969	1111
1917	1038	1004	979	1025	1058	1082	1085	1080	1015	1138	1059	986	967	1034	1096	1029	1051	881	957	930	1010	992	1060	947	967	962	1024	1027	1089	936	1043	1042	1037	1047	990	1101	1078	979	896	1137	985	1057	1090	1013	1016	929	970	995	1151
1918	958	982	913	1000	952	1025	1077	1023	961	1110	1105	1052	909	1055	1099	1018	1065	936	989	984	1020	968	1107	1004	992	1043	1023	1016	1131	827	1040	1000	1014	973	1000	1054	997	998	944	1079	972	1039	1067	1113	1063	940	913	1007	1145
1919	1145	1070	957	1045	1000	1048	1097	1063	1063	1201	1083	1107	963	1087	1137	1076	1092	814	977	861	973	1001	1043	981	993	979	1067	1038	1206	880	968	1000	942	982	928	1078	998	831	847	1022	890	965	1032	1072	918	885	891	983	1000
1920	1161	1064	970	1079	1069	1069	1194	1115	1076	1168	1116	1129	1018	1085	1143	1081	1120	928	1020	953	1029	1022	1102	1049	1026	1048	1076	1081	1128	911	1055	1068	1070	932	1020	1149	1057	1000	1070	1092	994	1111	1101	1110	1046	968	1022	1077	1147
1921	1031	1022	927	1008	983	1043	1078	992	975	1074	1059	1071	928	1007	1079	1007	1102	875	951	890	1020	952	1048	958	981	947	1007	1003	1104	844	939	1017	961	976	904	1044	1045	871	887	964	888	987	987	992	851	857	835	1064	1028
1922	1110	1085	1028	1046	996	1127	1190	1100	1100	1091	1081	1072	987	1110	1140	1102	1106	1035	1029	1018	1025	1040	1128	1024	1127	1038	1074	1004	1199	939	1059	996	1039	975	997	1057	1092	1057	975	1092	1075	1120	1104	1076	1022	1036	835	1075	1105
1923	1093	1072	938	1074	1022	1094	1138	939	986	1099	1079	1132	1002	1104	1098	1094	1144	901	987	943	1007	984	1072	1079	1092	1037	1076	1029	1153	981	963	1028	1035	895	1033	1116	1126	912	958	988	982	1027	1068	1123	888	1052	976	1086	1114
1924	1013	1021	904	1091	954	1050	1110	968	988	1053	966	975	860	996	975	950	1021	823	946	844	954	953	981	932	944	913	923	987	1086	946	945	966	1065	919	918	975	1078	1046	977	1081	948	1038	1008	1026	977	938	905	1049	1113
1925	968	888	880	950	1007	1067	987	938	880	927	986	1057	943	932	1056	964	1056	744	894	812	946	923	879	874	943	934	996	967	1148	944	974	943	902	830	940	1022	1077	889	892	896	889	988	1018	1022	823	953	928	1107	1090
1926	1057	1044	1009	1015	987	1011	1124	964	973	1040	962	1046	878	980	1077	1000	1066	846	920	837	950	1007	968	895	952	967	1011	980	1081	953	949	954	1007	881	973	973	1089	987	993	1027	921	1044	1050	1100	947	1037	962	1106	1068
1927	1052	1046	947	1117	1088	1100	1138	1060	1043	1142	1051	1171	1030	1087	1121	1077	1144	992	1106	953	1009	1091	1091	1074	1074	1078	1060	1049	1133	973	1015	1011	1032	1106	1006	1043	1066	931	955	1077	1021	1086	1014	1116	990	1073	1078	1128	1107
1928	1069	1014	900	1061	994	1068	1083	1021	1032	1097	998	1007	883	1021	1050	1029	1119	889	915	940	895	980	1010	964	995	986	1041	1015	1144	1015	1061	1006		1075	1004	1007	1114	944	965	1152	912	1094	1014	1075	1057	1073	1042	1163	1089
1929	1059	1104	998	1068	1061	1073	1081	1055	1022	1084	1036	1105	1022	1125	1106	1050	1151	978	1078	1007	1066	1075	1087	1081	1054	1029	1124	1116	1016	931	976	962	896	962	922	948	1009	884	883	1012	1011	1044	1015	1070	941	989	1007	1055	1036
1930	1051	1048	942	1026	1068	1056	1026	1032	978	1009	1030	1064	963	1089	1094	1049	1105	876	861	856	961	1009	1018	1018	991	973	1056	1048	1082	1029	980	1023	977	964	1002	1066	1056	1047	952	1106	1101	1078	1040	950	1055	1011	1042	1188	1122
1931	1035	1039	946	1031	1126	1026	985	1070	1043	1103	1034	1091	995	1121	1129	1060	1117	986	1031	969	959	1033	1119	1079	1064	1043	1089	1081	955	923	996	1014	930	1061	980	1043	1079	938	953	1107	1057	1078	1033	1051	1068	984	1008	1109	1056
1932	1020	1043	877	994	1119	943	1000	966	962	996	1003	1042	925	982	1029	981	960	783	858	877	866	986	976	1037	943	923	1064	1001	1105	966	1034	1041	988	967	982	1044	1103	981	991	1039	1051	1067	1015	1071	1014	981	1032	1102	1106
1933	959	975	892	965	906	918	1017	970	1002	998	1018	1017	935	1015	1021	983	1009	917	879	901	900	995	1013	995	980	928	1039	1033	1085	859	936	978	860	908	975	962	989	907	881	1065	965	1010	893	976	881	932	904	997	1072
1934	1007	1056	896	1007	1027	1015	1075	1011	1019	1050	1101	1027	923	1060	1092	1009	1069	942	1003	926	992	1028	1041	1044	1030	1000	1072	1042	1032	1000	1007	1045	930	989	1004	1020	1054	986	978	1054	971	987	969	1044	966	883	963	1024	1097
1935	1017	1051	901	985	957	1007	1054	990	1012	1104	1079	1060	946	1060	1092	988	1069	923	991	975	972	1037	1011	1044	1044	1026	1060	1051	1099	959	986	1004	1000	1000	1034	997	1036	985	993	1112	1011	1058	937	1067	970	905	916	1014	1120
1936	989	1081	882	978	1010	899	977	1006	907	1035	1112	994	903	1086	1090	1011	1021	928	946	896	963	1025	1049	1054	976	995	1095	1040	1027	940	917	979	908	949	945	989	1003	846	844	1039	967	978	953	1011	868	858	892	980	1072
1937	1033	1095	976	998	1015	978	1058	1000	926	1051	1041	1042	963	1009	1087	998	1030	875	869	839	942	992	961	915	917	906	1029	976	1052	954	960	1040	931	1005	1044	1030	1087	963	976	1096	956	968	957	1095	976	962	915	1064	1093
1938	932	1027	867	971	962	962	1017	956	968	982	1039	990	919	965	1037	961	1014	855	883	792	942	1017	952	993	926	964	975	935	1023	882	992	1069	895	943	1013	976	1040	906	907	1107	908	958	887	1043	919	893	891	977	1090
1939	940	994	856	898	935	886	879	963	881	962	1049	972	908	942	996	934	996	812	827	801	941	963	1044	946	925	1009	1011	1007	992	862	1011	1024	893	952	993	919	1016	883	896	1013	894	983	923	1036	884	836	902	963	1075
1940	984	1059	890	958	922	971	976	980	940	969	1037	988	930	964	1069	951	1035	849	862	832	904	1023	917	946	889	1007	965	1000	1037	906	930	1017	936	940	971	1028	1050	942	931	1085	856	985	947	1040	979	825	843	997	1106
1941	983	1002	895	980	873	982	971	944	945	963	1049	992	893	1041	1075	968	1008	861	975	838	968	988	995	1038	968	936	1010	1049	1026	960	961	1023	886	974	983	980	1010	896	895	1037	864	986	958	985	848	824	890	982	1103
1942	1031	1059	985	1049	920	1077	1011	1103	1072	1119	1155	1145	1003	1082	1095	1031	1017	997	1053	945	1075	1056	1085	1109	1026	821	1099	1098	1060	1027	960	1022	926	997	1031	1051	1040	968	975	1083	896	1011	993	1094	1000	916	891	1099	1137
1943	1103	1154	1027	1021	1025	1061	960	1081	1100	1120	1147	1196	1075	1121	1127	1106	1116	1041	1071	986	1046	1064	1072	1147	1097	923	1094	1113	1063	1009	1005	1016	1022	1078	1113	1109	1092	1052	996	1152	1021	1117	968	1143	1090	1087	974	1130	1206
1944	1009	1056	901	980	949	937	924	948	949	1052	1103	1074	990	1069	1094	926	1015	948	996	905	986	923	1060	1069	963	969	1041	1079	1046	969	930	1055	961	964	1029	1081	981	937	958	1125	939	1023	931	1026	1028	946	892	1089	1090
1945	1131	1152	1069	1142	1028	1088	1061	1137	1141	1156	1149	1147	1042	1120	1083	1027	1095	992	1103	1049	1039	974	1140	1172	1126	1006	1058	1169	995	1017	1045	1036	936	1092	1099	1111	1081	1079	1036	1203	1020	1105	1037	1061	1106	1026	950	1095	1090
1946	1088	1138	995	1032	1035	1011	1031	1059	1007	1145	1125	1150	1039	1084	1064	1095	1120	911	986	960	1060	1080	1063	1102	1023	1032	1064	1075	1042	1042	1080	1048	959	1103	1110	1104	1078	986	1010	1139	1021	1057	1048	1083	1068	1117	1021	1095	1161
1947	1132	1146	1031	1102	1044	984	1012	1117	1079	1173	1144	1141	993	1116	1147	1086	1113	969	961	972	1049	1053	1101	1133	1067	1057	1095	1130	1023	956	1001	992	903	997	966	1075	1074	964	1044	1146	998	1067	975	1022	974	1072	907	1089	1150
1948	1055	1045	884	936	995	936	924	971	956	1059	1003	1050	904	1038	1040	990	1017	846	915	840	1005	995	885	934	961	1034	982	1037	1013	946	979	953	906	937	988	1023	1036	917	962	1064	1000	949	998	1031	870	982	876	1077	1138
1949	1110	1076	989	1043	1031	948	987	1043	989	1056	1132	1202	994	1072	1113	1108	1125	963	937	967	1042	1049	1092	1087	1060	1090	1071	1094	979	890	993	1068	966	981	1046	1078	1080	988	1043	1146	976	925	1020	1063	997	1079	964	1042	1182
1950	1102	1130	1009	1009	960	972	1037	1077	1069	1129	1114	1156	997	1053	1049	1022	1083	954	938	961	1023	1038	1090	1046	996	1041	1016	1049	976	877	1066	1005	971	980	1010	1051	1032	941	974	1090	966	1030	1020	1036	1032	1062	1003	1106	1133
1951	1069	1091	1004	976	962	938	968	965	980	1079	1075	1158	945	1057	1042	1038	1099	885	896	909	1006	1028	1019	986	968	1003	1064	1052	1050	995	1003	965	976	991	1009	1059	1044	987	964	1151	991	1066	915	1010	1010	1046	920	1013	1143
1952	1035	1137	1023	1053	976	1036	1044	1021	1071	1150	1084	1126	995	1051	1058	1053	1081	838	956	947	1022	963	946	894	963	1030	1034	1021	1003	937	1051	978	982	1084	1020	1022	1045	1067	1011	1140	982	1043	990	951	1034	1051	944	1146	1141
1953		1055	937	1023	897	969	1005	813	1032	1122	1027	1166	920	1056	993	1012	1120	881	870	870	992	1012	996	1004	894	979	1028	1023	1013	947	995	934	964	994	962	986	968	996	940	1105	902	1009	815	881	975	914	836	1132	1083
1954	1010	1115	995	958	903	963	991	797	877	985	971	1123	878	1061	962	993	1043	854	806	817	939	972	934	915	859	919	1000	1011	1057	991	1017	1103	1015	998	990	998	1054	1042	973	1128	962	1010	949	916	985	1037	990	1192	1141
1955	993	998	912	891	934	910	964	973	912	968	1050	1116	916	1042	1034	973	1022	906	855	924	1012	965	1008	972	949	995	1083	1033	984	961	1005	933	890	887	946	976	931	972	914	1034	869	846	891	951	914	981	796	1062	1075
1956	1154	1143	1043	1017	976	988	1083	1090	996	1118	1120	1193	909	1127	1083	1046	1165	968	996	1031	1074	1095	1073	1075	1039	1004	1065	1064	1044	922	1106	1103	1067	1057	1093	1107	1099	1101	981	1220	1046	1081	1062	1091	1062	1138	1040	1143	1195
1957	1075	1088	1033	909	968	992	901	1066	998	1103	1113	1125	912	1051	1038	897	1050	907	943	1000	1066	985	1016	1057	997	993	1001	1037	1071	993	1025	911	961	992	928	1043	1020	949	922	1105	988	986	859	918	945	935	740	1041	1085
1958	1163	1144	1060	1085	1020	995	1024	1020	1060	1078	1108	1202	1043	1112	1074	991	1156	894	982	967	1046	1070	1082	1062	1034	1028	959	974	1107	1062	1035	983	984	1044	1002	1094	1059	1056	1014	1175	1011	1009	967	940	1014	1067	853	1117	1081
1959	1045	1067	933	990	924	949	981	1009	1005	1055	1079	1124	848	1069	1040	922	1040	837	915	910	990	970	916	965	972	941	1054	1013	1006	939	944	944	843	858	883	1040	1049	892	830	1024	858	867	1002	916	876	994	814	1125	1075
1960	948	1098	1060	1034	1027	990	1000	1024	1060	1032	1095	1172	804	1048	1053	841	1065	870	906	922	1015	1043	1008	981	977	900	1011	997	1060	993	1013	1103	1017	1017	1028	1138	1097	1057	913	1152	1034	1042	1095	937	994	981	858	1063	1032
1961	1084	1053	1055	1106	1047	1010	1036	1088	1067	1045	1133	1240	921	1155	1150	983	1173	949	1013	1040	1121	1092	1091	1088	1061	1051	1048	1084	1103	1036	1013	1061	1005	995	1038	1082	1108	1057	952	1139	1009	1018	1105	958	963	1075	843	1039	1120
1962	1058	1142	964	1103	981	955	1055	1060	1037	1119	1150	1236	875	1156	1142	950	1131	952	1003	971	1098	1106	1096	1093	1088	1056	1061	1094	1070	1070	1026	1035	993	1055	1035	1108	1072	998	910	1148	1019	1042	1126	899	934	1110	863	1087	1076
1963	1110	1085	980	1050	964	939	969	995	1017	1064	1005	1125		1040	1052	730	1100	877	887	903	901	910	965	947	932	947	922	949	1039	994	1018	840	971	959	1021	1061	1022	1009	940	1098	949	961	991	829	822	1097	724	1035	1031
1964	1068	1077	983	1008	960	960	997	1074	1106	1060	1089			1088	1093	1029	1045	961	1016	966	1079	1074	1061	1078	970	1053	1016	1028	1005	949	942	983	1006	958	946	1002	996	1019	969	1104	866	915	1011	957	851	1107	826	1065	1055
1965	973	947	900	966	931	905	904	1004	1023	1019	953			997	990	926	990	841	889	910	1013	1028	905	1022	973	943	901	907	1000	978	1005	1077	959	945	1027	1001	993	984	843	1097	960	997	947	936	890	1011	826	1057	1079
1966	1090	1056	1003	1132	1084	979	1076	1069	1102	1000	1083			1095	1041	942	1018	992	915	926	1112	995	1035	1037	988	1005	915	945	1028	1039	1034	1096	1049	1015	1035	1093	1001	1030	1013	1124	961	961	1060	963	953	1116	781	1035	1089
1967	1026	989	985	1058	1000	921	1016	1023	1034	1004	1073			1112	1081	946	1094	927	954		1033	1009	1016	1061	978	973	977	972	1058	1014	1027	981	986	1003	994	1078	1010	960	897	1085	974	1032	1071	992	873	1044	899	1049	1100
1968	1003	1024	943	1019	912	859	969	1027	981	958	1004			1021	991	757	1112	828	792		990	954	985	899	887	860	851	909	1057	1013	970	878	946	894	871	970	998	973	887	1083	927	966	959	846	863	996	718	983	1027
1969	1022	1008	951	1110	1058	952	1012	997	977	949	1075			1037	1026	1027	1099	855	974		1018	1017	1022	1040	934	990	938	969	1046	1013	946	935	1000	1024	1013	1036	1067	962	971	1060	1022	959	1017	1004	959	1116	803	1013	1146
1970	1094	1045	1011	1081	1044	938	1040	1043	1024	1089	1041			1101	1091	1087	955	973	1026		1081	1033	1025	1053	934	933	978	1030	1035	1046	989	1080	1032	1022	1018	1092	1078	833	959	1061	998	1048	1054	1056	983	1109	888	1045	1109
1971	1084	961	982	1026	1002	909	987	1040	1086	985	1103			1154	1185	1066	1009	1000	1018		1100	1061	1061	1091	1053	1051	1041	1047	1024	980	939	1013	976	1033	1053	1090	1113	914	1018	1155	1045	1134	1081	1013	1030	1150	962	1039	1155
1972	991	939	783	933	960	921	862	1024	940	968	930			1039	1061	870		804	937		928	946	945	954	845	853	877	901	979	924	969	960	878	925	933	1032	1022	939	825	1068	915	1016	963	981	849	1033	870	991	1046
1973	1164	1217	1040	1078	1025	933	1117	1099	1172	1002	1076			1136	1096	1010		1015	1027		1091	1057	1121	1100	1036	1006	955	1043	1020	1041	939	1058	1000	1032	1081	1020	1011	1024	944	1142	1066	1004	942	1090	920	1048	860	1028	1045
1974	1092	991	873	951	1012	934	974	1123	1071	909	1081			1140	1162	851		969	965		983	967	1077	1164	1052	1033	1014	1034	994	973	921	1040	994	1010	1051	1043	1056	983	883	1126	972	1039	913	995	824	1026	849	1033	1032
1975	1147	1015	1005	1009	1083	951	1062	1158	1151	995	1097			1110	1045	891		993	967		1049		1009	1109	1021	989	992	978	1026	993	872	954	987	930	1031	964	1020	1012	847	1109	995	966	961	1019	775	980	908	963	1008
1976	1023	1013	925	960	929	823	954	1018	1004	875	910			934	932	826		878	807		941	855	848	874	882	828	832	828	961	928	849	846	931	815	874	871	879	931	667	1000	843	903	885	910	631	834	742	932
1977	1023	1038	1041	1057	1040	907	981	979	1081	974	1009			1070	1011	997		892	857		1072	1009	1017	973	970	938	1010	934	1061	1028	978	1154	1039	997	1051	1022	1050	1039	939	1144	985	922	932	1100	904	989	834	1048
1978	997	1183	973	1085	1030	963	993	898	1052	926	1015			1059	1082			895	915		1032	972	1069	1003	997	954	1018	934	1022	989	917	1018	1002	952	961	1031	1003	968	855	1089	880	951	919	1039	748	927	902	1022
1979	1056	1175	1103	1178	1045	911	1053	1028	1117	886	965			1019	1168			910	904		1088	954	1061	1026	1003	934	955	924	1017	973	981	1010	1059	1062	1006	1041	1014	1004	937	1149	903	981	959	1038	700	913	876	981
1980	1061	1221	1039	1092	1004	910	973	1013	1091	898	917			984									958						1023	934	953	957	1032	1016	992	1016	1015	990	830	1090	1032	1023	955	966	688	898	862	962
[truncated: 16 more columns]

## Sheet: HSTC MXDchr — norm; var.stabil.
Year	HSTC MXD CHRONOLOGY	Sample replication
1650	11.63	3
1651	11	3
1652	8.97	3
1653	10.23	3
1654	10.43	4
1655	10.27	4
1656	9.1	4
1657	10.74	5
1658	10.12	5
1659	10.54	5
1660	9.68	6
1661	9.88	6
1662	10.2	6
1663	10	6
1664	10.08	6
1665	10.3	6
1666	8.87	6
1667	8.92	6
1668	9.67	6
1669	8.43	6
1670	9.02	6
1671	10.1	6
1672	10.13	6
1673	10.25	6
1674	9.67	6
1675	7.5	6
1676	9.58	6
1677	10.02	6
1678	8.77	6
1679	9.95	6
1680	9.65	6
1681	9.2	6
1682	9.92	6
1683	10.8	6
1684	8.88	6
1685	9.1	6
1686	10.65	6
1687	9.63	6
1688	8.73	6
1689	8.82	6
1690	9.44	7
1691	9.34	7
1692	9.41	7
1693	10.11	7
1694	9.34	7
1695	8.36	7
1696	9.8	7
1697	9.86	7
1698	8.77	7
1699	7.81	7
1700	8.59	7
1701	9.96	7
1702	10.01	7
1703	9.81	7
1704	10.59	7
1705	9.07	7
1706	10.7	7
1707	9.93	7
1708	10.64	7
1709	9.44	7
1710	10.71	7
1711	9.15	8
1712	9.52	8
1713	9.92	9
1714	8.65	10
1715	10.54	10
1716	8.18	10
1717	9.64	10
1718	10.38	10
1719	9.46	10
1720	10.54	10
1721	9.94	10
1722	10.12	10
1723	8.38	10
1724	10.29	10
1725	9.7	10
1726	8.97	11
1727	10.08	11
1728	10.38	11
1729	9.59	12
1730	9.55	12
1731	9.37	12
1732	10.53	12
1733	10.55	12
1734	10.94	15
1735	9.61	15
1736	9.72	16
1737	10.17	16
1738	9.24	16
1739	10.26	16
1740	8.34	16
1741	9.34	18
1742	8.64	18
1743	9.28	18
1744	9.64	18
1745	10.06	18
1746	10.38	19
1747	9.96	19
1748	9.86	19
1749	9.46	19
1750	10.64	19
1751	10.47	19
1752	10.32	19
1753	9.03	19
1754	9.7	19
1755	10.21	19
1756	10.09	19
1757	9.65	19
1758	9.79	20
1759	9.53	20
1760	10.59	20
1761	9.11	20
1762	10.51	21
1763	10.81	21
1764	10.1	21
1765	9.82	22
1766	10.03	22
1767	9.4	22
1768	11.1	22
1769	10.03	22
1770	9.8	22
1771	10.2	22
1772	10.14	22
1773	9.61	22
1774	10.67	23
1775	10.26	24
1776	9.79	25
1777	10.3	25
1778	9.75	25
1779	9.49	25
1780	9.52	25
1781	10.29	25
1782	10.76	25
1783	9.84	25
1784	10.92	25
1785	10.75	25
1786	9.56	25
1787	10.32	25
1788	10.29	25
1789	9.96	25
1790	10.12	25
1791	9.01	25
1792	10.06	25
1793	10.49	25
1794	9.67	25
1795	9.76	25
1796	9.89	25
1797	10.9	26
1798	9.27	26
1799	9.69	26
1800	9.94	26
1801	9.44	26
1802	10.26	27
1803	8.71	27
1804	10.24	27
1805	9.68	28
1806	9.71	28
1807	10.32	28
1808	8.99	28
1809	10.34	28
1810	10.1	29
1811	9.58	30
1812	8.59	30
1813	8.92	30
1814	7.83	30
1815	9.72	30
1816	8.47	30
1817	9.72	30
1818	9.42	30
1819	8.99	30
1820	10.43	31
1821	9.29	31
1822	10.64	31
1823	9.87	31
1824	9.61	31
1825	8.83	31
1826	9.36	31
1827	8.47	32
1828	10.76	32
1829	9.2	32
1830	10.69	34
1831	9.44	34
1832	9.69	34
1833	9.16	34
1834	10.02	34
1835	7.8	34
1836	9.91	34
1837	9.04	34
1838	10.21	34
1839	9.59	34
1840	9.8	34
1841	10.3	34
1842	8.49	34
1843	9.94	34
1844	10.28	34
1845	10.03	34
1846	10.59	35
1847	9.33	35
1848	10.41	35
1849	10.36	35
1850	8.78	35
1851	9.47	36
1852	9.81	36
1853	9.91	36
1854	9.82	36
1855	10.14	38
1856	9.53	39
1857	8.85	40
1858	8.96	41
1859	9.62	43
1860	10.26	45
1861	10.53	46
1862	10.16	47
1863	10.31	47
1864	9.31	47
1865	10.44	49
1866	10.1	50
1867	10.38	50
1868	9.7	52
1869	9.78	55
1870	9.35	55
1871	9.94	56
1872	10.5	56
1873	9.71	57
1874	10.15	60
1875	10.63	62
1876	9.71	62
1877	10.79	63
1878	10.7	64
1879	10.95	65
1880	9.48	65
1881	9.86	65
1882	10.09	65
1883	9.43	65
1884	8.57	65
1885	10.15	65
1886	9.87	65
1887	10.31	65
1888	10.49	65
1889	9.78	65
1890	9.65	65
1891	10.44	65
1892	9.7	65
1893	9.92	65
1894	10.35	65
1895	10.51	65
1896	8.59	65
1897	10.33	65
1898	9.82	65
1899	9.74	65
1900	9.74	65
1901	9.2	65
1902	10.5	65
1903	10.4	65
1904	10.24	65
1905	10.49	65
1906	9.9	65
1907	10.45	65
1908	9.91	65
1909	9.21	65
1910	9.25	65
1911	10.31	65
1912	9.02	65
1913	10.05	65
1914	8.95	65
1915	9.54	65
1916	9.52	65
1917	10.31	65
1918	10.04	65
1919	9.9	65
1920	10.82	65
1921	9.52	65
1922	10.66	65
1923	10.34	65
1924	9.76	65
1925	9.38	65
1926	9.78	65
1927	10.76	65
1928	10.18	65
1929	10.21	65
1930	10.35	65
1931	10.42	65
1932	9.94	65
1933	9.39	65
1934	10.3	65
1935	10.26	65
1936	9.65	65
1937	9.88	65
1938	9.33	65
1939	9.26	65
1940	9.4	65
1941	9.57	65
1942	10.3	65
1943	11.11	65
1944	10.05	65
1945	11.09	65
1946	10.92	65
1947	10.82	65
1948	9.59	65
1949	10.48	65
1950	10.44	65
1951	10.13	65
1952	10.45	65
1953	9.82	65
1954	9.84	65
1955	9.37	65
1956	10.86	65
1957	9.76	65
1958	10.47	65
1959	9.19	65
1960	10	65
1961	10.62	65
1962	10.6	65
1963	9.51	64
1964	9.94	63
1965	9.42	63
1966	10.24	62
1967	10.06	61
1968	9.07	61
1969	9.88	60
1970	10.38	60
1971	10.53	60
1972	9.13	59
1973	10.55	59
1974	10.12	59
1975	9.88	59
1976	8.18	58
1977	10.31	57
1978	9.75	56
1979	10.08	56
1980	9.8	46

## Sheet: Reconstr. AS Temp. — scaling
Year	Reconstructed August-September Temperature [°C]
1650	15.032
1651	13.997
1652	10.665
1653	12.733
1654	13.062
1655	12.799
1656	10.878
1657	13.571
1658	12.553
1659	13.242
1660	11.83
1661	12.159
1662	12.684
1663	12.356
1664	12.487
1665	12.848
1666	10.501
1667	10.583
1668	11.814
1669	9.778
1670	10.747
1671	12.52
1672	12.569
1673	12.766
1674	11.814
1675	8.252
1676	11.666
1677	12.389
1678	10.337
1679	12.274
1680	11.781
1681	11.042
1682	12.224
1683	13.669
1684	10.517
1685	10.878
1686	13.423
1687	11.748
1688	10.271
1689	10.419
1690	11.436
1691	11.272
1692	11.387
1693	12.536
1694	11.272
1695	9.663
1696	12.027
1697	12.126
1698	10.337
1699	8.761
1700	10.041
1701	12.29
1702	12.372
1703	12.044
1704	13.324
1705	10.829
1706	13.505
1707	12.241
1708	13.406
1709	11.436
1710	13.521
1711	10.96
1712	11.568
1713	12.224
1714	10.14
1715	13.242
1716	9.368
1717	11.765
1718	12.98
1719	11.469
1720	13.242
1721	12.257
1722	12.553
1723	9.696
1724	12.832
1725	11.863
1726	10.665
1727	12.487
1728	12.98
1729	11.683
1730	11.617
1731	11.322
1732	13.226
1733	13.259
1734	13.899
1735	11.716
1736	11.896
1737	12.635
1738	11.108
1739	12.783
1740	9.631
1741	11.272
1742	10.123
1743	11.174
1744	11.765
1745	12.454
1746	12.98
1747	12.29
1748	12.126
1749	11.469
1750	13.406
1751	13.127
1752	12.881
1753	10.763
1754	11.863
1755	12.701
1756	12.504
1757	11.781
1758	12.011
1759	11.584
1760	13.324
1761	10.895
1762	13.193
1763	13.686
1764	12.52
1765	12.06
1766	12.405
1767	11.371
1768	14.162
1769	12.405
1770	12.027
1771	12.684
1772	12.586
1773	11.716
1774	13.456
1775	12.783
1776	12.011
1777	12.848
1778	11.945
1779	11.519
1780	11.568
1781	12.832
1782	13.603
1783	12.093
1784	13.866
1785	13.587
1786	11.633
1787	12.881
1788	12.832
1789	12.29
1790	12.553
1791	10.731
1792	12.454
1793	13.16
1794	11.814
1795	11.962
1796	12.175
1797	13.833
1798	11.157
1799	11.847
1800	12.257
1801	11.436
1802	12.783
1803	10.238
1804	12.75
1805	11.83
1806	11.88
1807	12.881
1808	10.698
1809	12.914
1810	12.52
1811	11.666
1812	10.041
1813	10.583
1814	8.793
1815	11.896
1816	9.844
1817	11.896
1818	11.404
1819	10.698
1820	13.062
1821	11.19
1822	13.406
1823	12.142
1824	11.716
1825	10.435
1826	11.305
1827	9.844
1828	13.603
1829	11.042
1830	13.489
1831	11.436
1832	11.847
1833	10.977
1834	12.389
1835	8.744
1836	12.208
1837	10.78
1838	12.701
1839	11.683
1840	12.027
1841	12.848
1842	9.877
1843	12.257
1844	12.815
1845	12.405
1846	13.324
1847	11.256
1848	13.029
1849	12.947
1850	10.353
1851	11.486
1852	12.044
1853	12.208
1854	12.06
1855	12.586
1856	11.584
1857	10.468
1858	10.648
1859	11.732
1860	12.783
1861	13.226
1862	12.618
1863	12.865
1864	11.223
1865	13.078
1866	12.52
1867	12.98
1868	11.863
1869	11.995
1870	11.289
1871	12.257
1872	13.177
1873	11.88
1874	12.602
1875	13.39
1876	11.88
1877	13.653
1878	13.505
1879	13.915
1880	11.502
1881	12.126
1882	12.504
1883	11.42
1884	10.008
1885	12.602
1886	12.142
1887	12.865
1888	13.16
1889	11.995
1890	11.781
1891	13.078
1892	11.863
1893	12.224
1894	12.93
1895	13.193
1896	10.041
1897	12.898
1898	12.06
1899	11.929
1900	11.929
1901	11.042
1902	13.177
1903	13.012
1904	12.75
1905	13.16
1906	12.192
1907	13.095
1908	12.208
1909	11.059
1910	11.125
1911	12.865
1912	10.747
1913	12.438
1914	10.632
1915	11.601
1916	11.568
1917	12.865
1918	12.421
1919	12.192
1920	13.702
1921	11.568
1922	13.439
1923	12.914
1924	11.962
1925	11.338
1926	11.995
1927	13.603
1928	12.651
1929	12.701
1930	12.93
1931	13.045
1932	12.257
1933	11.354
1934	12.848
1935	12.783
1936	11.781
1937	12.159
1938	11.256
1939	11.141
1940	11.371
1941	11.65
1942	12.848
1943	14.178
1944	12.438
1945	14.145
1946	13.866
1947	13.702
1948	11.683
1949	13.144
1950	13.078
1951	12.569
1952	13.095
1953	12.06
1954	12.093
1955	11.322
1956	13.768
1957	11.962
1958	13.127
1959	11.026
1960	12.356
1961	13.374
1962	13.341
1963	11.551
1964	12.257
1965	11.404
1966	12.75
1967	12.454
1968	10.829
1969	12.159
1970	12.98
1971	13.226
1972	10.928
1973	13.259
1974	12.553
1975	12.159
1976	9.368
1977	12.865
1978	11.945
1979	12.487
1980	12.027

## Sheet: 1. Instr. Aug-Sep Temp.
Year	01_TMM Aug-Sep — Instrumental [°C]
1774	12.77
1775	11.91
1776	11.23
1777	11.85
1778	11.5
1779	12.44
1780	11.75
1781	13.36
1782	12.82
1783	12.51
1784	13.56
1785	12.98
1786	10.57
1787	12.47
1788	12.53
1789	12.3
1790	12.5
1791	12.65
1792	12.38
1793	12.81
1794	10.82
1795	12.31
1796	13
1797	14.16
1798	13.32
1799	12.96
1800	12.4
1801	11.92
1802	13.4
1803	11.36
1804	11.84
1805	11.7
1806	11.61
1807	13.99
1808	12.31
1809	11.29
1810	12.78
1811	11.79
1812	10.51
1813	10.54
1814	8.84
1815	10.03
1816	9.24
1817	11.84
1818	10.73
1819	11.01
1820	12.59
1821	12.44
1822	12.3
1823	12.4
1824	12.4
1825	12.25
1826	12.72
1827	10.41
1828	11.86
1829	10.73
1830	11.37
1831	10.76
1832	11.85
1833	9.58
1834	13.07
1835	10.51
1836	10.99
1837	11.76
1838	11.07
1839	11.66
1840	11.7
1841	11.93
1842	10.97
1843	11.54
1844	11.76
1845	10.67
1846	11.95
1847	10.75
1848	12.17
1849	11.74
1850	10.82
1851	9.95
1852	11.37
1853	11.97
1854	11.29
1855	11.16
1856	11.87
1857	11.85
1858	10.98
1859	12.22
1860	11.67
1861	13.8
1862	11.49
1863	12.87
1864	11.87
1865	12.48
1866	11.44
1867	13.28
1868	12.34
1869	11.67
1870	10.76
1871	12.54
1872	12.22
1873	13.07
1874	12.87
1875	12.49
1876	11.94
1877	13.05
1878	12.41
1879	13.43
1880	11.47
1881	11.69
1882	11.29
1883	11.11
1884	11.44
1885	12.98
1886	12.17
1887	12.89
1888	11.94
1889	11.16
1890	11.5
1891	11.95
1892	12.13
1893	12.75
1894	12.52
1895	12.79
1896	11.09
1897	12.29
1898	12.39
1899	12.32
1900	12.12
1901	12.02
1902	12.7
1903	12.51
1904	11.72
1905	13.36
1906	11.82
1907	12.61
1908	11.53
1909	12.01
1910	11.1
1911	13.56
1912	10.17
1913	11.82
1914	11.45
1915	10.9
1916	10.98
1917	13.58
1918	12.79
1919	12.99
1920	12.75
1921	12.66
1922	12.95
1923	13.61
1924	12.4
1925	12.51
1926	12.39
1927	13.32
1928	14.55
1929	12.74
1930	12.74
1931	11.94
1932	14.29
1933	12.24
1934	12.48
1935	12.61
1936	12.33
1937	12.17
1938	11.88
1939	12.32
1940	11.45
1941	11.14
1942	13.23
1943	15.02
1944	13.03
1945	13.1
1946	15.09
1947	13.77
1948	12.14
1949	13.06
1950	13.57
1951	13.49
1952	13.55
1953	12.98
1954	12.49
1955	11.19
1956	13.97
1957	12.15
1958	13.55
1959	11.73
1960	11.85
1961	13.5
1962	13.76
1963	12.86
1964	12.11
1965	11.46
1966	12.58
1967	13.01
1968	11.37
1969	12.17
1970	13.1
1971	12.94
1972	10.84
1973	13.55
1974	13.34
1975	13.2
1976	10.4
1977	11.47
1978	11.71
1979	11.95
1980	13.29
1981	12.85
1982	14
1983	12.9
1984	11.55
1985	13.8
1986	13.64
1987	14.97
1988	13.48
1989	12.77
1990	13.03
1991	14.04
1992	14.5
1993	14.12
1994	15.28
1995	11.86
1996	11.65
1997	13.42
Year	August-September Temperature [°C]
1998	13.83
1999	14.58
2000	14.25
2001	13.46
2002	12.18
2003	14.84
2004	13.8
2005	12.78
2006	13.26
2007	12.98
2008	13.67
2009	14.75
2010	12.98
2011	15.29
2012	14.96
2013	14.11
2014	13.33
