# Supplementary material for: Climate signals in a multispecies tree-ring network from central and southern Italy and reconstruction of the late summer temperatures since the early 1700s
Source: Copernicus journal article supplement (doi:10.5194/cp-13-1451-2017), 2017-11-02
Supplement: Supplementary file 2 [file cp-13-1451-2017-supplement.zip]

Archive with 3 entries (3 files):
- OnLineMaterial2.xlsx
- OnLineMaterial1.pdf
- cp-13-1451-2017-supplement-title-page.pdf
